# Supplementary material for: Polarization-controllable Airy beams generated via a photoaligned director-variant liquid crystal mask
Source: PubMed Central journal article supplement (PMC4667248; doi:10.1038/srep17484), 2015-12-02
Supplement: srep17484-s1.pdf [file srep17484-s1.pdf]

# **Polarization-controllable Airy beams generated via a photoaligned director-variant liquid crystal mask**

Bing-Yan Wei<sup>1</sup>, Peng Chen<sup>1</sup>, Wei Hu<sup>1,\*</sup>, Wei Ji<sup>1</sup>, Li-Yang Zheng<sup>1</sup>, Shi-Jun Ge<sup>1</sup>, Yang Ming<sup>1</sup>, Vladimir Chigrinov<sup>2</sup> & Yan-Qing Lu<sup>1,\*</sup>

<sup>1</sup>National Laboratory of Solid State Microstructures, Collaborative Innovation Center of Advanced Microstructures and College of Engineering and Applied Sciences, Nanjing University, Nanjing 210093, China.

<sup>2</sup>Center for Display Research, Department of Electronic and Computer Engineering, Hong Kong University of Science and Technology, Clear Water Bay, Kowloon, Hong Kong, China.

\*Correspondence and requests for materials should be addressed to W. H. (email: [huwei@nju.edu.cn](mailto:huwei@nju.edu.cn)) and to Y. L. (email: [yqlu@nju.edu.cn](mailto:yqlu@nju.edu.cn)).

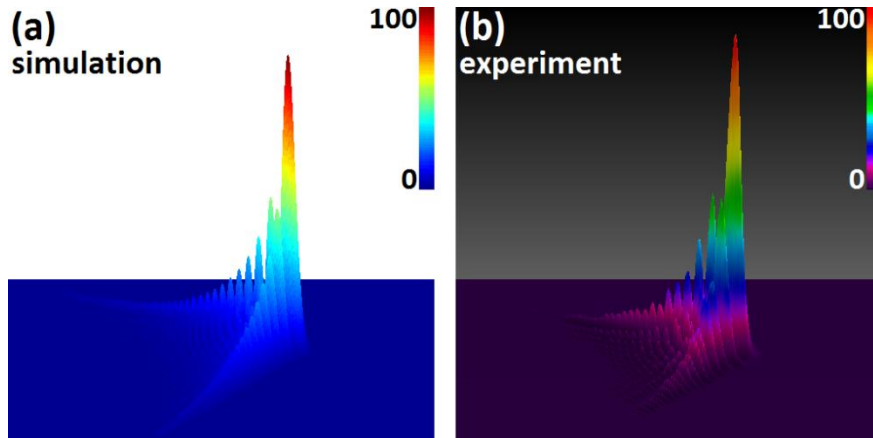

**Figure S1.** 3D intensity distributions of (a) simulated and (b) experimentally obtained Airy beams.

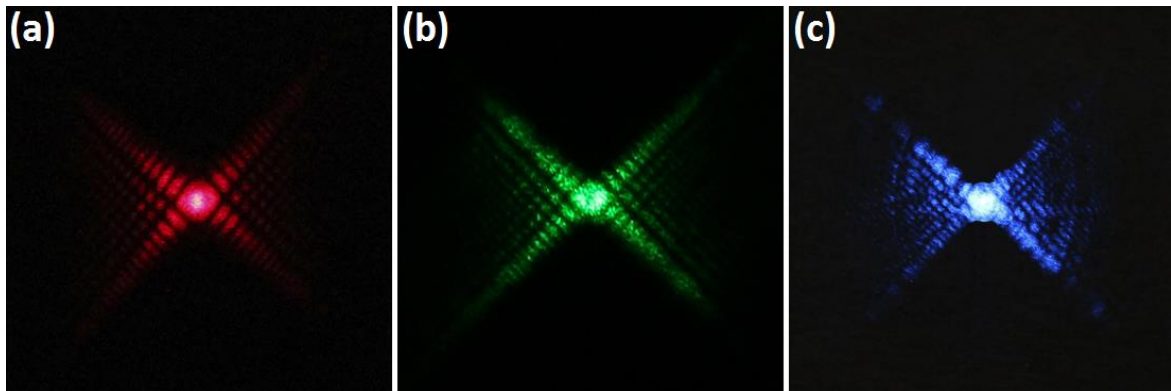

**Figure S2.** Airy beams of different wavelengths: (a) 722 nm, (b) 532 nm and (c) 473 nm.

The Airy beams in different colors captured by camera proved that the PAM can work at a wide spectrum via applying proper voltages. Due to the lack of corresponding quarter waveplates, Airy beams with two branches are exhibited. According to the equation<sup>1</sup>  $2\pi\Delta n d/\lambda = \pi$  (taking  $\Delta n = 0.2$ ,  $d = 4.5 \mu\text{m}$ ), our sample could work at the maximum wavelength of  $1.8 \mu\text{m}$ . The value could be further increased by introducing larger  $d$ . As the SD1 absorbs 473 nm laser light, the pattern decays after long time illumination. Therefore, the profile of blue Airy beams is not so good as red and green ones.

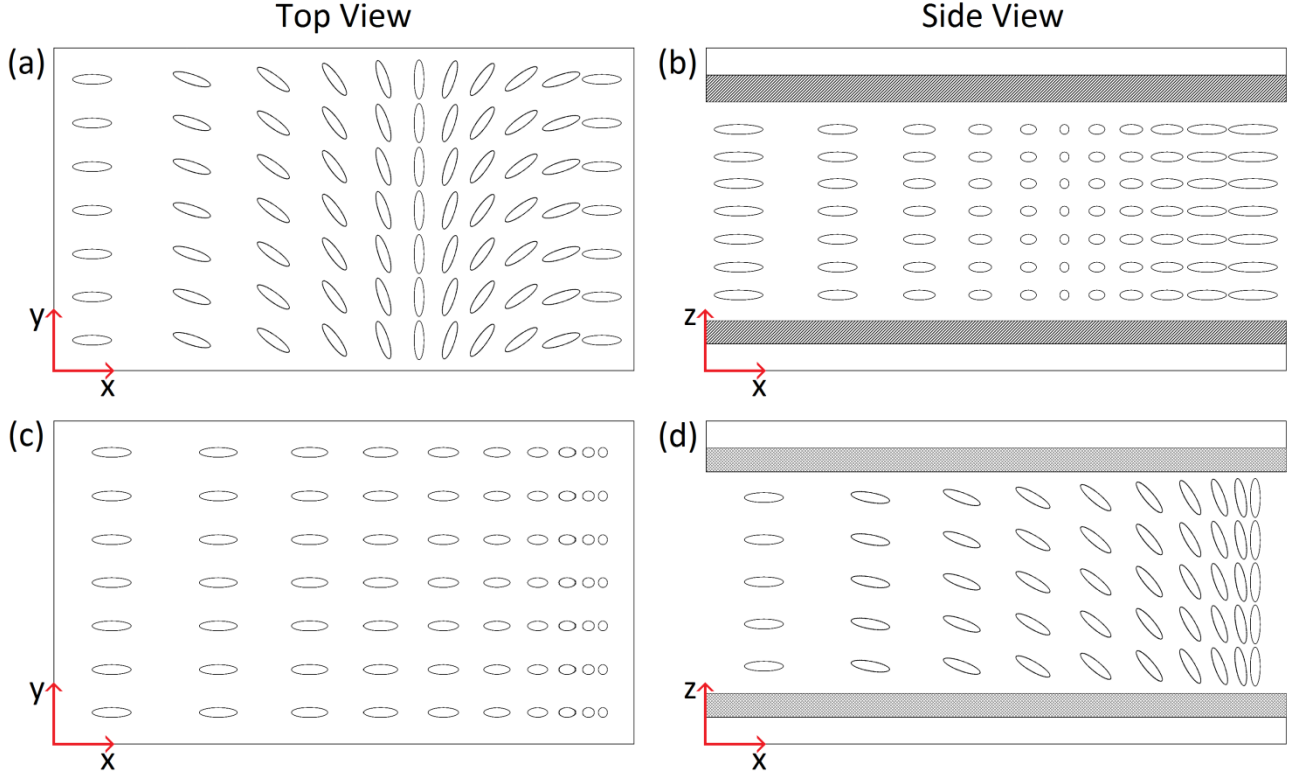

**Figure S3.** Diagrams of the LC director orientation of the proposed PAM and commercial SLM. (a) top view and (b) side view of PAM ; (c) top view and (d) side view of SLM.

Figure S3 schematically reveals the different LC director orientations of the PAM and SLM. We take a single period of the cubic phase pattern as an example, therefore the orientation of LC directors changes nonlinearly along the  $x$  direction. Figure S3a and b are the top and side views of PAM respectively, while c and d are those of SLM. For PAM, the azimuthal angles of LCs are arranged from 0 to  $\pi$  in the  $x$ - $y$  plane and the tilt angle is fixed 0 in the  $x$ - $z$  plane. While in commercial SLM, the cubic phase retardance is realized by electrically tuning the tilt angle of LC molecules (0 to  $\pi/2$  for instance here). According to the equation<sup>1</sup>

$$n_{eff}(z) = \frac{n_e n_o}{\sqrt{n_e^2 \sin^2 \theta(z) + n_o^2 \cos^2 \theta(z)}}, \quad (S1)$$

where  $n_{eff}$  is the effective refractive index of LC,  $\theta(z)$  is the tilt angle defined as the angle between LC director and  $x$ - $y$  plane. When different electric fields in different areas are applied along the  $z$  direction, the LC molecules tilt at different angles and the light will encounter the corresponding refractive index  $n_{eff}$ . Therefore the cubic retardation of the LC is formed.

#### Supplementary Reference:

1. Yang, D. K. & Wu, S. T. *Fundamentals of liquid crystal devices*. (Wiley, England, 2006).
